# Supplementary material for: LXRα Regulates Hepatic ChREBPα Activity and Lipogenesis upon Glucose, but Not Fructose Feeding in Mice
Source: MDPI journal article supplement (doi:10.3390/nu9070678), 2017-06-29

Supplemental Figure S1.

A. Cytosol

B. Nucleus

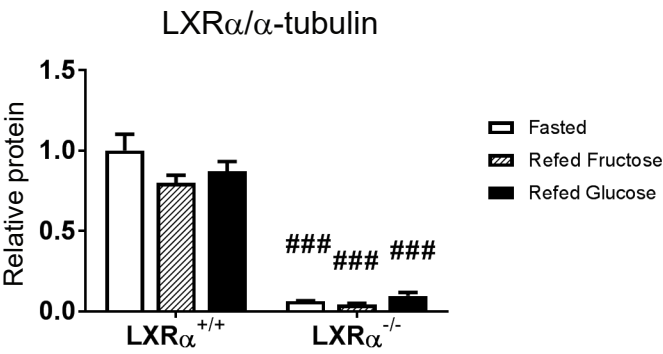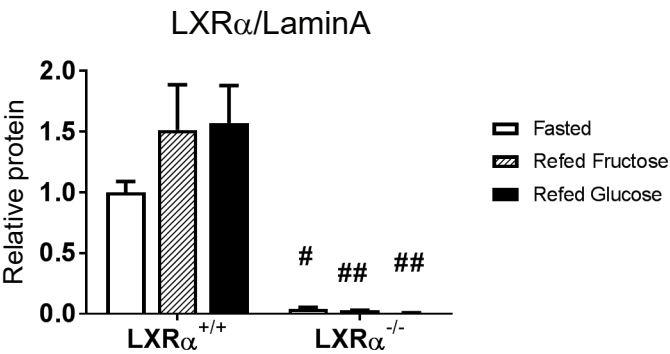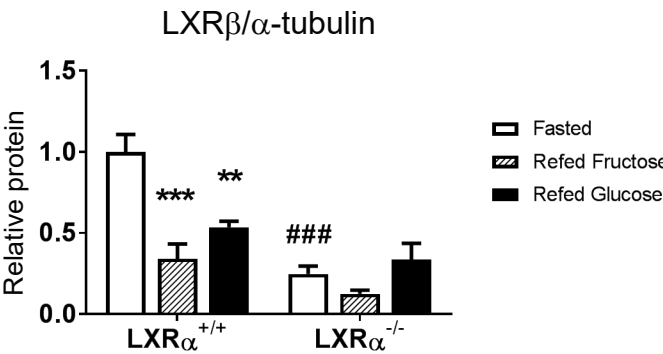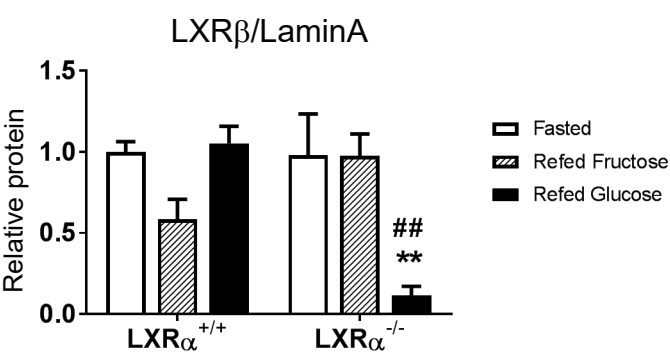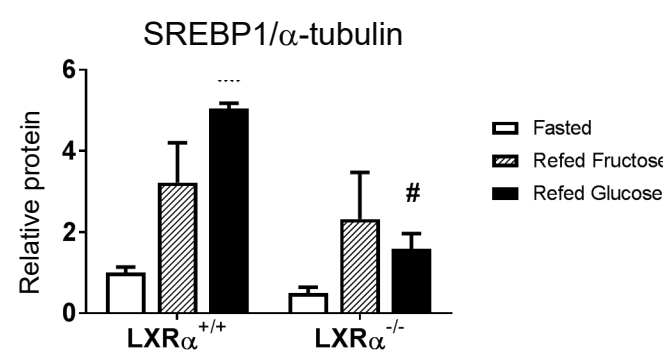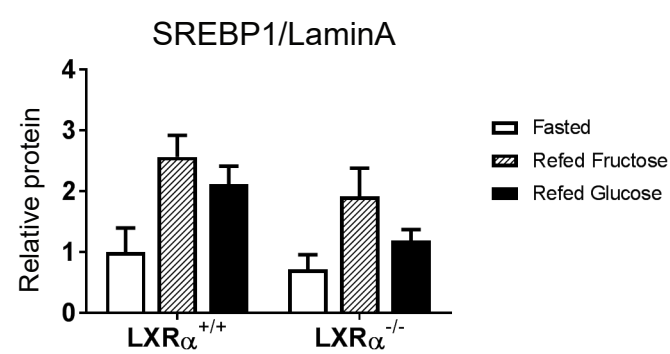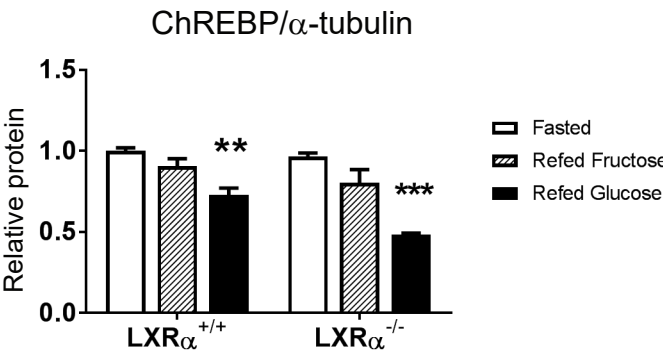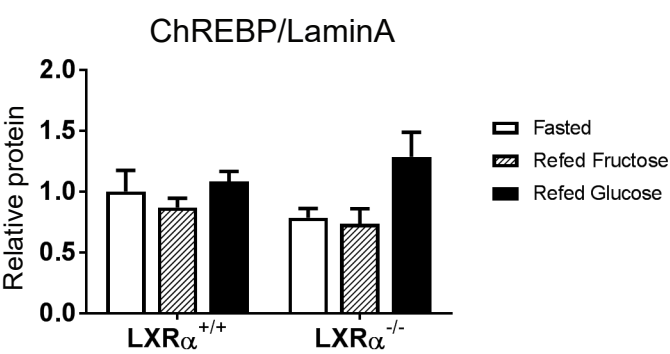

Supplemental Figure S2.

A. Cytosol

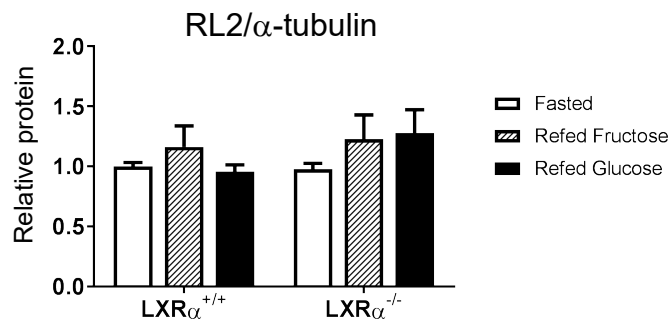

B. Nuclear Input

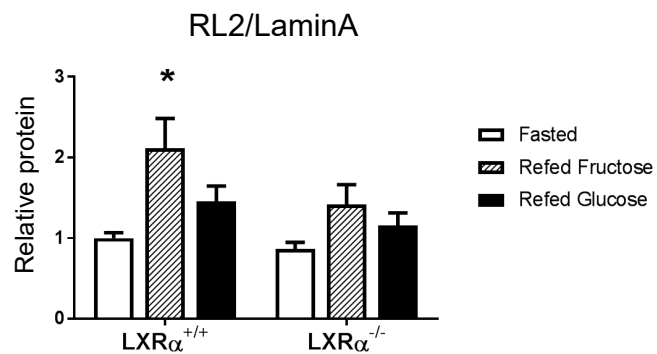

C. Nuclear WGA

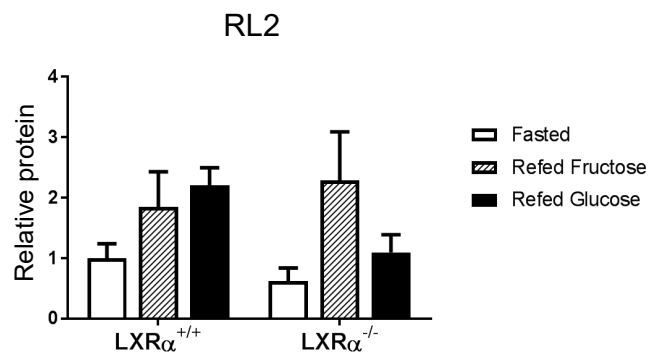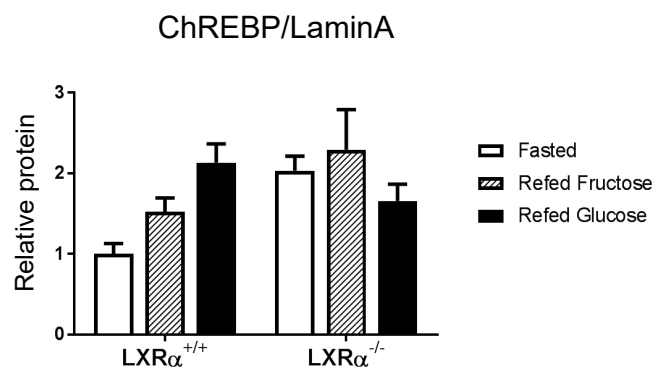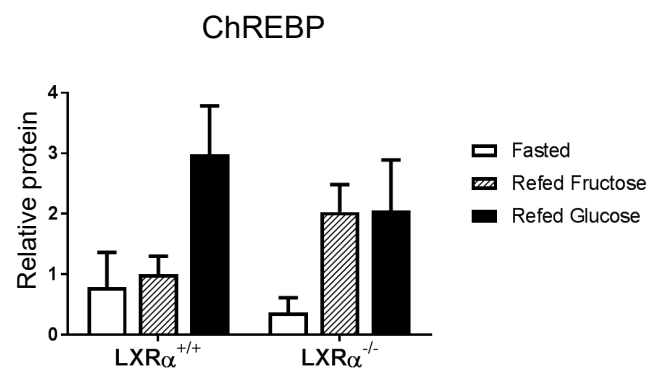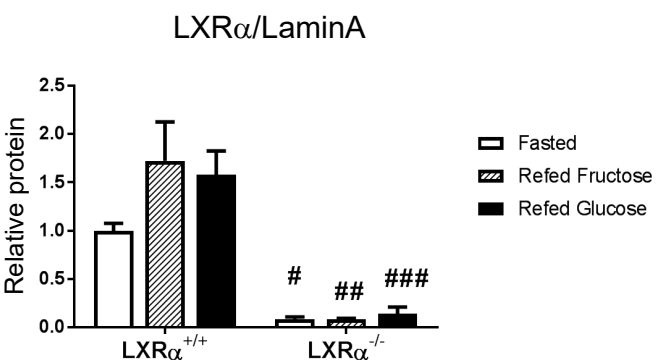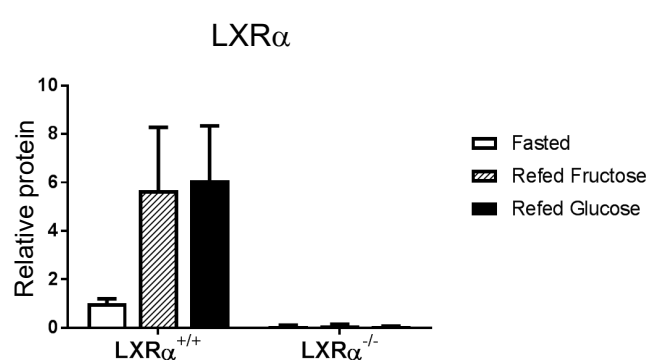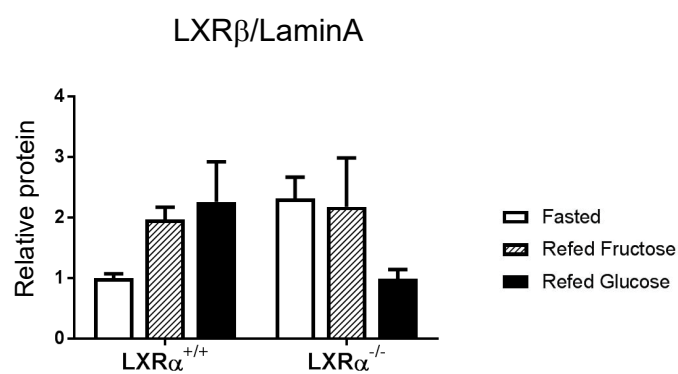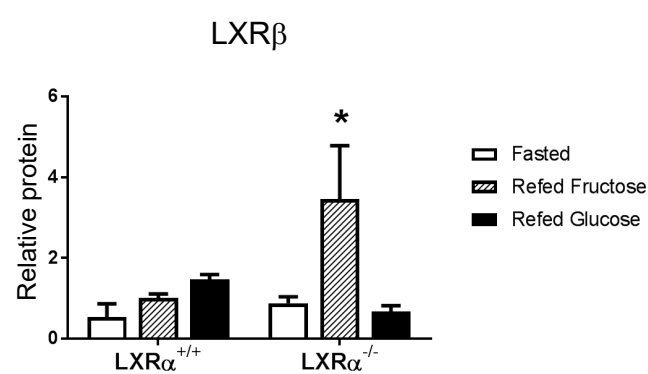

Supplement: s1 [file s1]
