# Supplementary material for: LXRα Regulates Hepatic ChREBPα Activity and Lipogenesis upon Glucose, but Not Fructose Feeding in Mice
Source: MDPI journal article supplement (doi:10.3390/nu9070678), 2017-06-29
Supplement: s1 [file s1]

**Supplementary Table S1.** Mouse SYBR Green Primers sequences.

| Gene Name                                                           | Gene Symbol  | Abbreviation in Text and Figures | Primer Forward          | Primer Reverse         |
|---------------------------------------------------------------------|--------------|----------------------------------|-------------------------|------------------------|
| Acetyl-CoA carboxylase- $\alpha$                                    | Acc $\alpha$ | ACC $\alpha$                     | TGTACAAGCAGTGTGGGCTGGCT | CCACATGGCCTGGCTTGGAGGG |
| Acetyl-CoA carboxylase- $\beta$                                     | Acc $\beta$  | ACC $\beta$                      | TCCTTCCAGAACTCCTCCCG    | GACATGCTGGGCCTCATAGT   |
| ATP citrate lyase                                                   | Acly         | ACL                              | GCCCCAAGATTCAGTCCCAAG   | GCCTTGGTATGTCGGCTGAA   |
| Aldolase B                                                          | Aldob        | AldoB                            | AAGCGGGCTATGGCTAACTG    | CTGTGAAGAGCGACTGGGTG   |
| MLX interacting protein-like                                        | Mlxip1       | ChREBP $\alpha$                  | CGACACTCACCCACCTCTTC    | TTGTTCAGCCGGATCTTGTC   |
|                                                                     |              | ChREBP $\beta$                   | TCTGCAGATCGCGTGGAG      | CTTGTCCCGGCATAGCAAC    |
| Fatty acid synthase                                                 | Fasn         | FASN                             | AGATGGAAGGCTGGGCTCTA    | GGCGTCGAACTTGGAGAGAT   |
| Ketohexokinase (Fruktokinase)                                       | Khk          | FK                               | AACTCCTGCACTGTCCTTTCCTT | CCACCAGGAAGTCGGCAA     |
| Glucose-6-phosphatase, catalytic                                    | G6pc         | G6Pase                           | GCTGGAGTCTTGTCAGGCAT    | CGGAGGCTGGCATTGTAGAT   |
| Glucokinase                                                         | Gk           | GK                               | AACGACCCCTGCTTATCCTC    | CTGCTCTACCAGAGTCAACGAC |
| Solute carrier family 2 (facilitated glucose transporter), member 2 | Slc2a2       | Glut2                            | ATCGCTCCAACCACACTCAG    | GCTGAGGCCAGCAATCTGAC   |
| Pyruvate kinase liver and red blood cell                            | Pklr         | L-PK                             | CAGCAGTATGGAAGGGCCAG    | AGTTGCTGCTGCTGGAAGAA   |
| Nuclear receptor subfamily 1, group H, member 3                     | Nr1h3        | LXR $\alpha$                     | GGAGTGTGCACTTCGCAAATG   | CAGCACACACTCCTCCCTCA   |
| Nuclear receptor subfamily 1, group H, member 2                     | Nr1h2        | LXR $\beta$                      | GCTCTGCCTACATCGTGGTCA   | TGCGCTCAGGCTCATCCT     |
| Phosphoenolpyruvate carboxykinase 1, cytosolic                      | Pck1         | PEPCK                            | CCTAGTGCCTGTGGGAAGAC    | AAGTTGCCTTGGGCATCAAAC  |
| Stearoyl-CoA desaturase 1                                           | Scd1         | SCD1                             | AAAGCCGAGAAGCTGGTGAT    | TACAAAAGTCTCGCCCCAGC   |
| Sterol regulatory element binding transcription factor 1            | Srebf1       | SREBP-1c                         | GGAGCCATGGATTGCACATT    | GCTTCCAGAGAGGAGGCCAG   |
| TATA box binding protein                                            | Tbp          | TBP                              | GCACAGGAGCCAAGAGTGAA    | TAGCTGGGAAGCCCAACTTC   |
